# Supplementary material for: Burrow nests fall below critical temperatures of threatened seabirds but offer thermal refuge during extreme cold events
Source: Atypon-hosted journal article supplement (doi:10.1139/facets-2023-0131), 2024-01-01

# Supplementary Material 2 - Model Selection Procedure for Correlates of Burrow Microclimate and Buffering Capacity

Burrows buffer nest temperatures and offer a stable thermal microclimate for threatened seabird chicks during extreme events

31 March, 2024

## Contents

|                                                                               |           |
|-------------------------------------------------------------------------------|-----------|
| <b>PETREL MODEL - correlates of burrow microclimate</b>                       | <b>2</b>  |
| Model S2.1, S2.2 and S2.3 - Initial Models . . . . .                          | 2         |
| Model S2.4 - Increase the knots for Julian date . . . . .                     | 3         |
| Model S2.5 - Increase the knots again for Julian date . . . . .               | 4         |
| Explore model fit . . . . .                                                   | 5         |
| Model S2.6 - GMM with corAR1 . . . . .                                        | 5         |
| Explore model fit . . . . .                                                   | 7         |
| <b>PUFFIN MODEL - correlates of burrow microclimate</b>                       | <b>9</b>  |
| Exploring wind speed . . . . .                                                | 9         |
| Model S2.7, S2.8, and S2.9 - Initial models . . . . .                         | 10        |
| Model S2.10 - Increase the knots for Julian date . . . . .                    | 12        |
| Model S2.11 - Increase the knots for the interaction term . . . . .           | 13        |
| Explore model fit . . . . .                                                   | 14        |
| Model S2.12 - GMM with corAR1 . . . . .                                       | 14        |
| Explore model fit . . . . .                                                   | 16        |
| <b>PETREL MODELS - Favourable burrow features during extreme temperatures</b> | <b>18</b> |
| Model S2.13 - GAM model - Cold extreme . . . . .                              | 19        |
| Explore model fit . . . . .                                                   | 19        |
| Model S2.14 - GMM with corAR1 - cold extreme . . . . .                        | 22        |
| Explore model fit . . . . .                                                   | 24        |
| <b>PUFFIN MODELS - Favourable burrow features during extreme temperatures</b> | <b>28</b> |
| Model S2.15 - GAM model - Cold extreme . . . . .                              | 29        |
| Explore model fit . . . . .                                                   | 29        |
| Model S2.16 - GMM with corAR1 - cold extreme . . . . .                        | 32        |
| Explore model fit . . . . .                                                   | 34        |

## PETREL MODEL - correlates of burrow microclimate

Here we show the steps followed to test for correlation between external environmental conditions and petrel burrow thermal environment.

We tested a variety of models including GAM and GAMM. Additionally we tried different methods of accounting for autocorrelation.

### Model S2.1, S2.2 and S2.3 - Initial Models

Run three initial models to identify whether the weather variables should be fitted as spline terms, a spline interaction term or linear interaction term.

```
# MODEL S2.1
# Model with spline fits
m1_petrel <- gam(data = lssp,
  Inside~s(scale(Temperature), bs="ts") + # Weather
    s(scale(Wind.Speed), bs="ts") + # Weather
    s(Time, bs="cc") + # Time
    s(julian, bs="ts") + # Date
    s(Burrow, bs="re"), # random effect
  method = "REML")

# MODEL S2.2
# Explore temp-wind interaction term
m2_petrel <- gam(data = lssp,
  Inside~s(scale(Temperature), scale(Wind.Speed), bs="ts") +
    s(Time, bs="cc") + # Time
    s(julian, bs="ts") + # Date
    s(Burrow, bs="re"), # random effect
  method = "REML")

# MODEL S2.3
# Explore Linear interaction
m3_petrel <- gam(data = lssp,
  Inside~scale(Temperature) * scale(Wind.Speed) +
    s(Time, bs="cc") + # Time
    s(julian, bs="ts") + # Date
    s(Burrow, bs="re"), # random effect
  method = "REML")
```

### Compare the AIC

Spline interaction (m2\_petrel) has the lowest AIC score.

```
AIC(m1_petrel, m2_petrel, m3_petrel)
```

```
##           df      AIC
## m1_petrel 64.48478 150509.2
## m2_petrel 75.14165 149706.6
## m3_petrel 50.57213 151031.4
```

### Model Summary

```

##
## Family: gaussian
## Link function: identity
##
## Formula:
## Inside ~ s(scale(Temperature), scale(Wind.Speed), bs = "ts") +
##       s(Time, bs = "cc") + s(julian, bs = "ts") + s(Burrow, bs = "re")
##
## Parametric coefficients:
##           Estimate Std. Error t value Pr(>|t|)
## (Intercept) 15.7516    0.1421   110.8 <2e-16 ***
## ---
## Signif. codes:  0 '***' 0.001 '**' 0.01 '*' 0.05 '.' 0.1 ' ' 1
##
## Approximate significance of smooth terms:
##                                     edf Ref.df      F p-value
## s(scale(Temperature),scale(Wind.Speed)) 27.443    29 19357.7 <2e-16 ***
## s(Time)                                7.548     8   576.3 <2e-16 ***
## s(julian)                               8.971     9   2786.2 <2e-16 ***
## s(Burrow)                              28.987    29   2260.5 <2e-16 ***
## ---
## Signif. codes:  0 '***' 0.001 '**' 0.01 '*' 0.05 '.' 0.1 ' ' 1
##
## R-sq.(adj) = 0.678  Deviance explained = 67.8%
## -REML = 75047  Scale est. = 0.58166  n = 65170

```

## Model S2.4 - Increase the knots for Julian date

From the summary table of `m2_petrel`, the edf is close to the ref.df, indicating that the knots may need to be increased. Here we double the knots to 20.

```

# MODEL S2.4
m4_petrel <- gam(data = lssp,
  Inside~s(scale(Temperature), scale(Wind.Speed), bs="ts") +
    s(Time, bs="cc") + # Time
    s(julian, bs="ts", k = 20) + # Date
    s(Burrow, bs="re"), # random effect
  method = "REML")

```

## Model Summary

```

##
## Family: gaussian
## Link function: identity
##
## Formula:
## Inside ~ s(scale(Temperature), scale(Wind.Speed), bs = "ts") +
##       s(Time, bs = "cc") + s(julian, bs = "ts", k = 20) + s(Burrow,
##       bs = "re")
##
## Parametric coefficients:
##           Estimate Std. Error t value Pr(>|t|)
## (Intercept) 15.7516    0.1418   111.1 <2e-16 ***

```

```

## ---
## Signif. codes:  0 '***' 0.001 '**' 0.01 '*' 0.05 '.' 0.1 ' ' 1
##
## Approximate significance of smooth terms:
##
##           edf Ref.df      F p-value
## s(scale(Temperature),scale(Wind.Speed)) 26.413    29 6258.2 <2e-16 ***
## s(Time)                                7.343     8  347.8 <2e-16 ***
## s(julian)                               18.977    19 2672.1 <2e-16 ***
## s(Burrow)                              28.990    29 2854.4 <2e-16 ***
## ---
## Signif. codes:  0 '***' 0.001 '**' 0.01 '*' 0.05 '.' 0.1 ' ' 1
##
## R-sq.(adj) =  0.746   Deviance explained = 74.6%
## -REML = 67371   Scale est. = 0.45894   n = 65170

```

## Model S2.5 - Increase the knots again for Julian date

```

# MODEL S2.5
m5_petrel <- gam(data = lssp,
  Inside~s(scale(Temperature), scale(Wind.Speed), bs="ts") +
    s(Time, bs="cc") + # Time
    s(julian, bs="ts", k = 40) + # Date
    s(Burrow, bs="re"), # random effect
  method = "REML")

```

### Model Summary

From the summary of `m5_petrel`, the edf continues to be close to the ref.df value, but we are unable to increase the knots further.

```

##
## Family: gaussian
## Link function: identity
##
## Formula:
## Inside ~ s(scale(Temperature), scale(Wind.Speed), bs = "ts") +
##       s(Time, bs = "cc") + s(julian, bs = "ts", k = 40) + s(Burrow,
##       bs = "re")
##
## Parametric coefficients:
##           Estimate Std. Error t value Pr(>|t|)
## (Intercept) 15.7516    0.1418  111.1 <2e-16 ***
## ---
## Signif. codes:  0 '***' 0.001 '**' 0.01 '*' 0.05 '.' 0.1 ' ' 1
##
## Approximate significance of smooth terms:
##
##           edf Ref.df      F p-value
## s(scale(Temperature),scale(Wind.Speed)) 25.984    29 6197.7 <2e-16 ***
## s(Time)                                7.239     8  297.9 <2e-16 ***
## s(julian)                              38.870    39 1722.0 <2e-16 ***
## s(Burrow)                              28.991    29 3249.9 <2e-16 ***
## ---

```

```
## Signif. codes:  0 '***' 0.001 '**' 0.01 '*' 0.05 '.' 0.1 ' ' 1
##
## R-sq.(adj) =  0.777   Deviance explained = 77.7%
## -REML = 63201   Scale est. = 0.40298   n = 65170
```

## Compare AIC

Model `m5_petrel` with  $k = 40$  has the lowest AIC score.

```
AIC(m2_petrel, m4_petrel, m5_petrel)
```

```
##           df      AIC
## m2_petrel 75.14165 149706.6
## m4_petrel 83.98264 134273.0
## m5_petrel 103.52789 125819.1
```

## Explore model fit

### Test for temporal autocorrelation

The model `m5_petrel` is highly autocorrelated, therefore, we reject this model.

```
acf(residuals(m5_petrel))
```

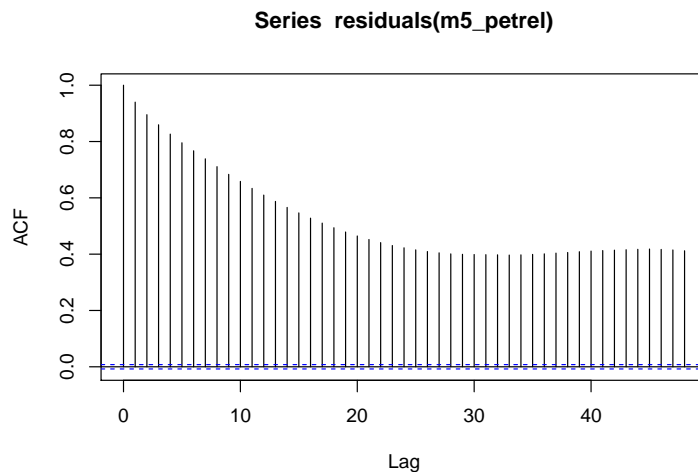

## Model S2.6 - GAMM with corAR1

We will also explore the GAMM option with burrow as a random effect and include a `corAR1` term to account for autocorrelation. We removed the date and time terms because the `corAR1` term is accounting for the autocorrelation.

```
# MODEL S2.6
gamm1_petrel <- gamm(data = lssp,
  Inside~s(scale(Temperature), scale(Wind.Speed), bs="ts"),
  random = list(Burrow = ~1), # Burrow features
  corr = corAR1(form = ~ 1|Burrow),
  method = "REML")
```

## Model Summary - gam

```
##
## Family: gaussian
## Link function: identity
##
## Formula:
## Inside ~ s(scale(Temperature), scale(Wind.Speed), bs = "ts")
##
## Parametric coefficients:
##           Estimate Std. Error t value Pr(>|t|)
## (Intercept)  15.70      0.14   112.1  <2e-16 ***
## ---
## Signif. codes:  0 '***' 0.001 '**' 0.01 '*' 0.05 '.' 0.1 ' ' 1
##
## Approximate significance of smooth terms:
##                                     edf Ref.df    F  p-value
## s(scale(Temperature),scale(Wind.Speed)) 1.83     29 0.979 3.99e-07 ***
## ---
## Signif. codes:  0 '***' 0.001 '**' 0.01 '*' 0.05 '.' 0.1 ' ' 1
##
## R-sq.(adj) =  0.00402
##   Scale est. = 1.3542    n = 65170
```

## Model Summary - lme

```
## Linear mixed-effects model fit by REML
##   Data: strip.offset(mf)
##       AIC      BIC   logLik
## -26368.28 -26322.86 13189.14
##
## Random effects:
## Formula: ~Xr - 1 | g
## Structure: pdIdnot
##           Xr1      Xr2      Xr3      Xr4      Xr5      Xr6
## StdDev: 0.001724764 0.001724764 0.001724764 0.001724764 0.001724764 0.001724764
##           Xr7      Xr8      Xr9      Xr10     Xr11     Xr12
## StdDev: 0.001724764 0.001724764 0.001724764 0.001724764 0.001724764 0.001724764
##           Xr13     Xr14     Xr15     Xr16     Xr17     Xr18
## StdDev: 0.001724764 0.001724764 0.001724764 0.001724764 0.001724764 0.001724764
##           Xr19     Xr20     Xr21     Xr22     Xr23     Xr24
## StdDev: 0.001724764 0.001724764 0.001724764 0.001724764 0.001724764 0.001724764
##           Xr25     Xr26     Xr27     Xr28     Xr29
## StdDev: 0.001724764 0.001724764 0.001724764 0.001724764 0.001724764
##
## Formula: ~1 | Burrow %in% g
##           (Intercept) Residual
## StdDev:  0.7125722 1.163683
##
## Correlation Structure: AR(1)
## Formula: ~1 | g/Burrow
## Parameter estimate(s):
##           Phi
```

```

## 0.9855106
## Fixed effects: y ~ X - 1
##   Value Std.Error   DF t-value p-value
## X  15.7 0.1400175 65140 112.1289     0
##
## Standardized Within-Group Residuals:
##      Min      Q1      Med      Q3      Max
## -4.43842778 -0.46178015 0.05880828 0.61881330 5.09200097
##
## Number of Observations: 65170
## Number of Groups:
##      g Burrow %in% g
##      1          30

```

## Explore model fit

### Test for temporal autocorrelation

The residual function for gam in R returns the residuals without adjustment for the correlation structure. So must specify type = "normalized"

```
acf(residuals(gamm1_petrel$lme, type = "normalized"))
```

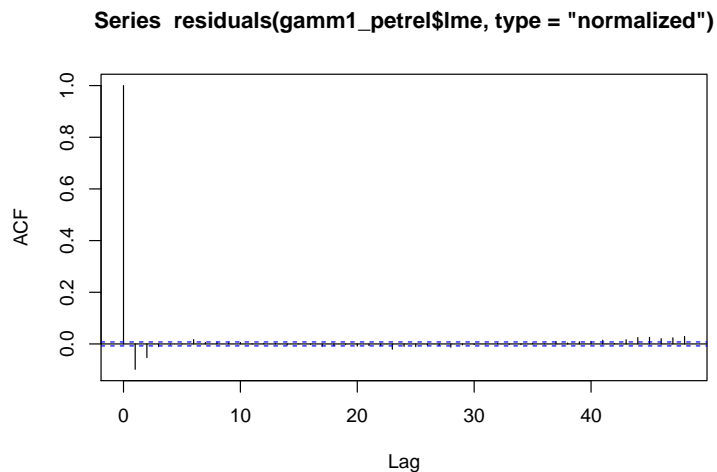

### Gam.check

```
gam.check(gamm1_petrel$gam)
```

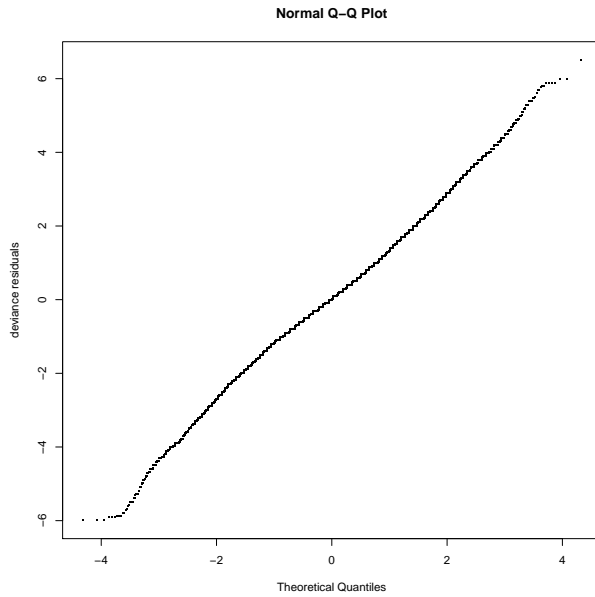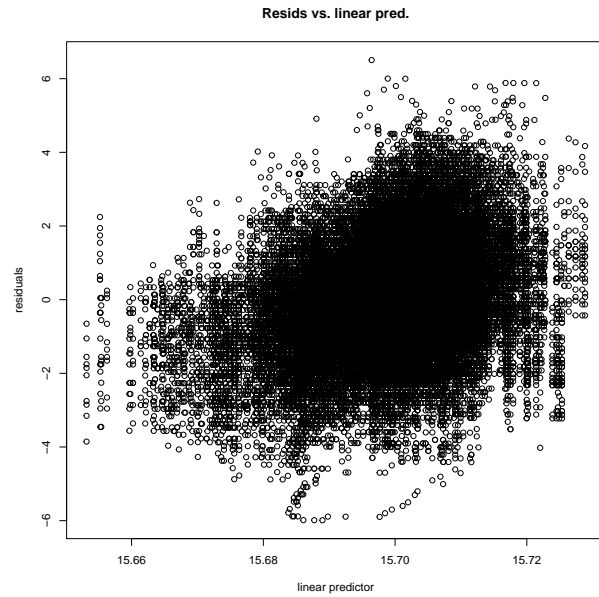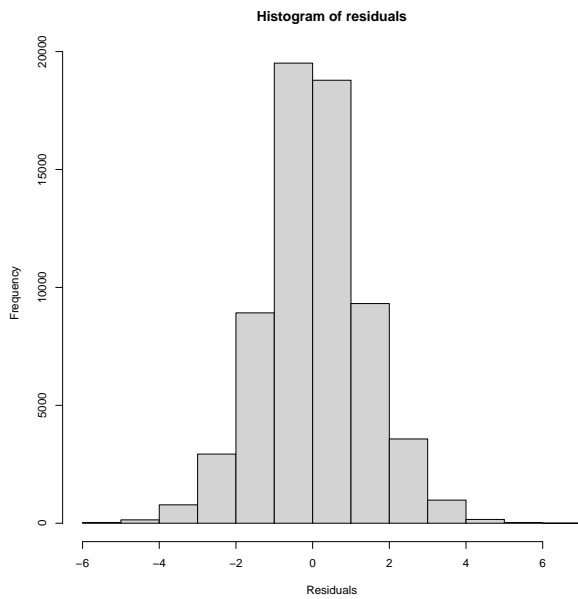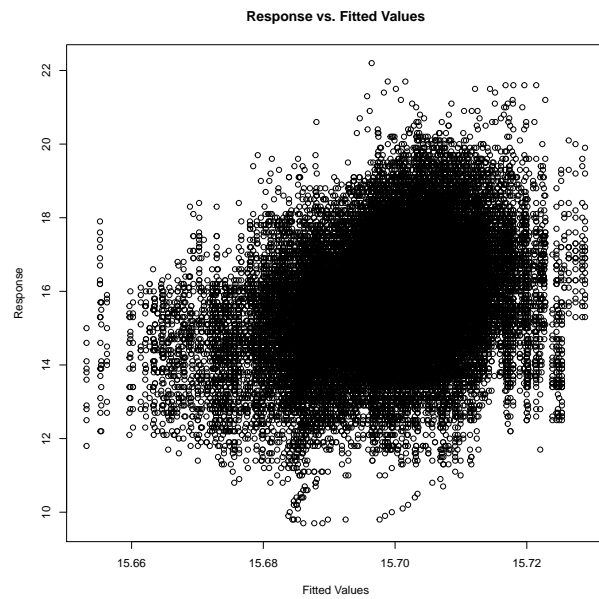

```
##
## 'gamm' based fit - care required with interpretation.
## Checks based on working residuals may be misleading.
## Basis dimension (k) checking results. Low p-value (k-index<1) may
## indicate that k is too low, especially if edf is close to k'.
##
##           k'   edf k-index p-value
## s(scale(Temperature),scale(Wind.Speed)) 29.00  1.83   0.77 <2e-16 ***
## ---
## Signif. codes:  0 '***' 0.001 '**' 0.01 '*' 0.05 '.' 0.1 ' ' 1
```



## lme plot

```
plot(gamm1_petrel$lme)
```

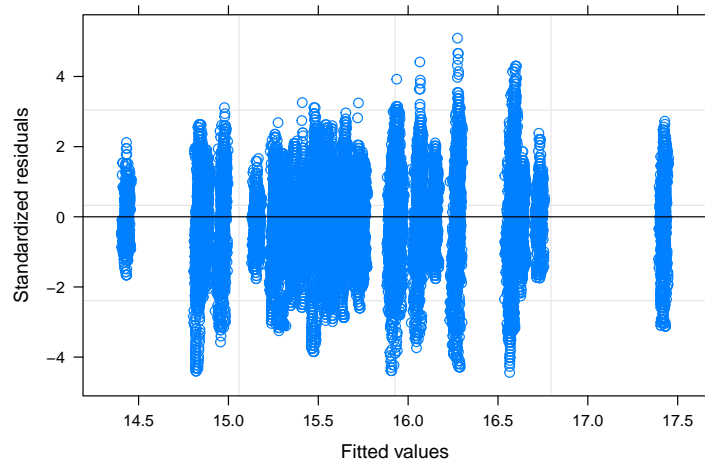

## Visualise the temp-wind interaction in 2D

```
plot(gamm1_petrel$gam, scheme = 2, pages = 1)
```

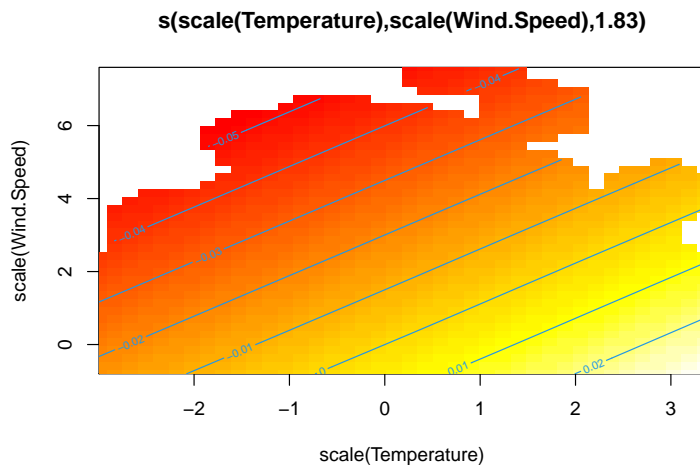

## PUFFIN MODEL - correlates of burrow microclimate

Here we show the modelling steps followed to arrive at the final selected model used to test correlates of Atlantic puffin burrow microclimates.

### Exploring wind speed

In the plot below, the data for wind speed exceed the speeds recorded during the hurricane, suggesting that there may be issues with data at these three points. They occurred all on the same day over a 1.5 hour period.

```
plot(atpu$Wind.Speed, atpu$Inside)
```

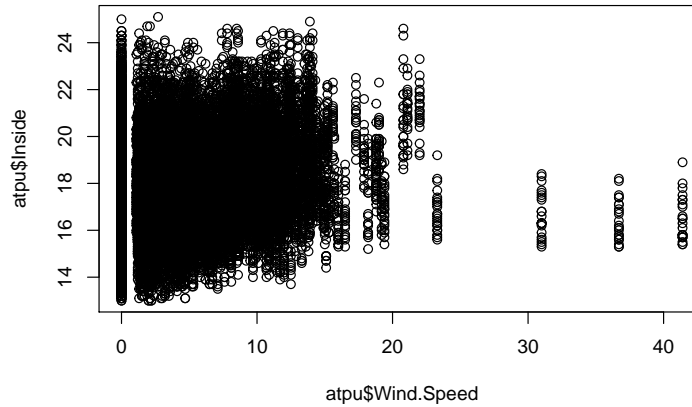

### Removing potentially erroneous data

We will remove the high wind speed records for the modelling.

```
# Remove the higher wind speeds  
atpu.wind <- atpu %>% filter(Wind.Speed < 30)  
  
# Visualise the data  
plot(atpu.wind$Wind.Speed, atpu.wind$Inside)
```

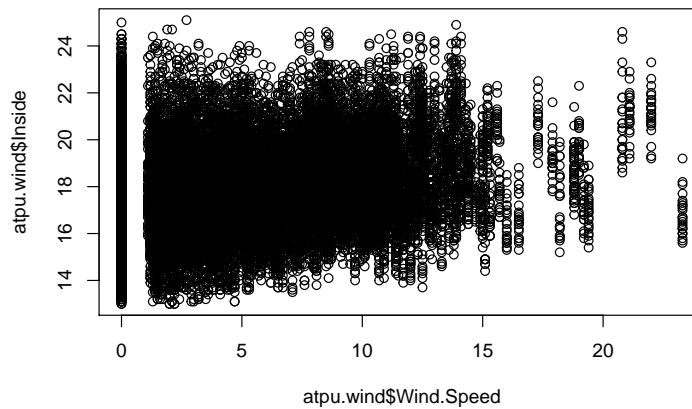

### Model S2.7, S2.8, and S2.9 - Initial models

Run three initial models to identify whether the weather variables should be fitted as spline terms, a spline interaction term or linear interaction term.

```

# MODEL S2.7
# Model with spline fits
m1_puffin <- gam(data = atpu.wind,
  Inside~s(scale(Temperature), bs="ts") + # Weather
    s(scale(Wind.Speed),bs="ts") + # Weather
    s(Time, bs="cc") + # Time
    s(julian, bs="ts") + # Date
    s(Burrow, bs="re"), # random effect
  method = "REML")

# MODEL S2.8
# Explore temp-wind interaction term
m2_puffin <- gam(data = atpu.wind,
  Inside~s(scale(Temperature), scale(Wind.Speed), bs="ts") +
    s(Time, bs="cc") + # Time
    s(julian, bs="ts") + # Date
    s(Burrow, bs="re"), # random effect
  method = "REML")

# MODEL S2.9
# Explore Linear interaction
m3_puffin <- gam(data = atpu.wind,
  Inside~scale(Temperature) * scale(Wind.Speed) +
    s(Time, bs="cc") + # Time
    s(julian, bs="ts") + # Date
    s(Burrow, bs="re"), # random effect
  method = "REML")

```

## Compare AIC

Spline interaction (m2\_puffin) has the lowest AIC score

```
AIC(m1_puffin, m2_puffin, m3_puffin)
```

```

##           df      AIC
## m1_puffin 58.17853 102887.8
## m2_puffin 68.93652 101397.3
## m3_puffin 43.68667 102512.1

```

## Model Summary

```

##
## Family: gaussian
## Link function: identity
##
## Formula:
## Inside ~ s(scale(Temperature), scale(Wind.Speed), bs = "ts") +
##       s(Time, bs = "cc") + s(julian, bs = "ts") + s(Burrow, bs = "re")
##
## Parametric coefficients:
##           Estimate Std. Error t value Pr(>|t|)
## (Intercept) 17.9177      0.2039   87.86 <2e-16 ***
## ---

```

```
## Signif. codes:  0 '***' 0.001 '**' 0.01 '*' 0.05 '.' 0.1 ' ' 1
##
## Approximate significance of smooth terms:
##                edf Ref.df      F p-value
## s(scale(Temperature),scale(Wind.Speed)) 28.184    29 238.7 <2e-16 ***
## s(Time)                                7.632     8 898.6 <2e-16 ***
## s(julian)                               8.989     9 605.1 <2e-16 ***
## s(Burrow)                              21.985    22 1470.2 <2e-16 ***
## ---
## Signif. codes:  0 '***' 0.001 '**' 0.01 '*' 0.05 '.' 0.1 ' ' 1
##
## R-sq.(adj) =  0.656   Deviance explained = 65.6%
## -REML = 50876   Scale est. = 1.0081    n = 35604
```

## Model S2.10 - Increase the knots for Julian date

From the summary table of `m2_puffin`, the edf is close to the ref.df, indicating that the knots may need to be increased. Here we double the knots to 20.

```
# MODEL S2.10
m4_puffin <- gam(data = atpu.wind,
  Inside~s(scale(Temperature), scale(Wind.Speed), bs="ts") +
    s(Time, bs="cc") +
    s(julian, bs="ts", k = 20)+ # Time and date
    s(Burrow, bs="re"), # random effect
  method = "REML")
```

## Model Summary

The edf continues to be close to the ref.df value, but we are unable to increase the knots further.

```
##
## Family: gaussian
## Link function: identity
##
## Formula:
## Inside ~ s(scale(Temperature), scale(Wind.Speed), bs = "ts") +
##       s(Time, bs = "cc") + s(julian, bs = "ts", k = 20) + s(Burrow,
##       bs = "re")
##
## Parametric coefficients:
##               Estimate Std. Error t value Pr(>|t|)
## (Intercept)  17.9177    0.2039   87.87 <2e-16 ***
## ---
## Signif. codes:  0 '***' 0.001 '**' 0.01 '*' 0.05 '.' 0.1 ' ' 1
##
## Approximate significance of smooth terms:
##                edf Ref.df      F p-value
## s(scale(Temperature),scale(Wind.Speed)) 27.691    29 158.5 <2e-16 ***
## s(Time)                                7.657     8 974.6 <2e-16 ***
## s(julian)                              18.966    19 722.2 <2e-16 ***
## s(Burrow)                              21.988    22 1766.3 <2e-16 ***
## ---
```

```
## Signif. codes:  0 '***' 0.001 '**' 0.01 '*' 0.05 '.' 0.1 ' ' 1
##
## R-sq.(adj) =  0.713   Deviance explained = 71.4%
## -REML = 47649   Scale est. = 0.83918   n = 35604
```

## Compare AIC

Increasing the knots reduces the AIC score.

```
AIC(m2_puffin, m4_puffin)
```

```
##              df          AIC
## m2_puffin 68.93652 101397.30
## m4_puffin 78.46728  94876.93
```

## Model S2.11 - Increase the knots for the interaction term

From the summary table of `m4_puffin`, the edf is close to the ref.df, indicating that the knots may need to be increased. Here we double to knots to 60.

```
# MODEL S2.11
m5_puffin <- gam(data = atpu.wind,
  Inside~s(scale(Temperature), scale(Wind.Speed), bs="ts", k = 60) +
    s(Time, bs="cc") +
    s(julian, bs="ts", k = 20)+ # Time and date
    s(Burrow, bs="re"), # random effect
  method = "REML")
```

## Model Summary

```
##
## Family: gaussian
## Link function: identity
##
## Formula:
## Inside ~ s(scale(Temperature), scale(Wind.Speed), bs = "ts",
##           k = 60) + s(Time, bs = "cc") + s(julian, bs = "ts", k = 20) +
##           s(Burrow, bs = "re")
##
## Parametric coefficients:
##               Estimate Std. Error t value Pr(>|t|)
## (Intercept)  17.9177      0.2041   87.79  <2e-16 ***
## ---
## Signif. codes:  0 '***' 0.001 '**' 0.01 '*' 0.05 '.' 0.1 ' ' 1
##
## Approximate significance of smooth terms:
##              edf Ref.df      F p-value
## s(scale(Temperature),scale(Wind.Speed)) 53.701     59  83.48 <2e-16 ***
## s(Time)                                7.677       8 965.81 <2e-16 ***
## s(julian)                               18.965     19 695.99 <2e-16 ***
## s(Burrow)                               21.988     22 1780.86 <2e-16 ***
## ---
```

```
## Signif. codes:  0 '***' 0.001 '**' 0.01 '*' 0.05 '.' 0.1 ' ' 1
##
## R-sq.(adj) =  0.716   Deviance explained = 71.7%
## -REML = 47543   Scale est. = 0.83233   n = 35604
```

## Compare AIC

Increasing the knots reduces the AIC score. We will now explore the model fit.

```
AIC(m4_puffin, m5_puffin)
```

```
##           df      AIC
## m4_puffin 78.46728 94876.93
## m5_puffin 104.68594 94611.23
```

## Explore model fit

### Test for temporal autocorrelation

The model `m5_puffin` is highly autocorrelated, therefore, we reject this model.

```
acf(residuals(m5_puffin))
```

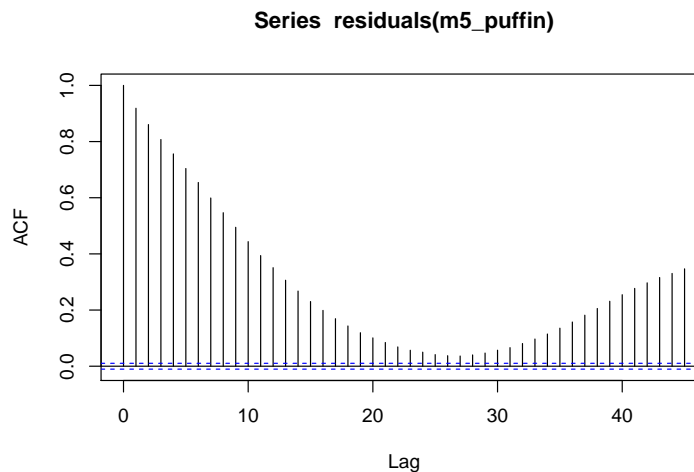

## Model S2.12 - GAMM with corAR1

We will also explore the GAMM option with burrow as a random effect and include a `corAR1` term to account for autocorrelation. We removed the date and time terms because the `corAR1` term is accounting for the autocorrelation.

```
## Model S2.12
gamm1_puffin <- gamm(data = atpu.wind,
  Inside~s(scale(Temperature), scale(Wind.Speed), bs="ts"),
  random = list(Burrow = ~1), # Burrow features
  corr = corAR1(form = ~ 1|Burrow),
  method = "REML")
```

## Model Summary - gam

```
##
## Family: gaussian
## Link function: identity
##
## Formula:
## Inside ~ s(scale(Temperature), scale(Wind.Speed), bs = "ts")
##
## Parametric coefficients:
##           Estimate Std. Error t value Pr(>|t|)
## (Intercept)  17.947      0.205   87.54  <2e-16 ***
## ---
## Signif. codes:  0 '***' 0.001 '**' 0.01 '*' 0.05 '.' 0.1 ' ' 1
##
## Approximate significance of smooth terms:
##           edf Ref.df    F p-value
## s(scale(Temperature),scale(Wind.Speed)) 25.31    29 27.78 <2e-16 ***
## ---
## Signif. codes:  0 '***' 0.001 '**' 0.01 '*' 0.05 '.' 0.1 ' ' 1
##
## R-sq.(adj) =  0.0698
##   Scale est. = 1.8759    n = 35604
```

## Model Summary - lme

```
## Linear mixed-effects model fit by REML
##   Data: strip.offset(mf)
##       AIC      BIC    logLik
## 18554.43 18596.83 -9272.214
##
## Random effects:
## Formula: ~Xr - 1 | g
## Structure: pdIdnot
##           Xr1      Xr2      Xr3      Xr4      Xr5      Xr6      Xr7
## StdDev: 0.2455661 0.2455661 0.2455661 0.2455661 0.2455661 0.2455661 0.2455661
##           Xr8      Xr9      Xr10     Xr11     Xr12     Xr13     Xr14
## StdDev: 0.2455661 0.2455661 0.2455661 0.2455661 0.2455661 0.2455661 0.2455661
##           Xr15     Xr16     Xr17     Xr18     Xr19     Xr20     Xr21
## StdDev: 0.2455661 0.2455661 0.2455661 0.2455661 0.2455661 0.2455661 0.2455661
##           Xr22     Xr23     Xr24     Xr25     Xr26     Xr27     Xr28
## StdDev: 0.2455661 0.2455661 0.2455661 0.2455661 0.2455661 0.2455661 0.2455661
##           Xr29
## StdDev: 0.2455661
##
## Formula: ~1 | Burrow %in% g
##           (Intercept) Residual
## StdDev:  0.9383819 1.369634
##
## Correlation Structure: AR(1)
## Formula: ~1 | g/Burrow
## Parameter estimate(s):
##           Phi
```

```

## 0.9735332
## Fixed effects: y ~ X - 1
##      Value Std.Error   DF  t-value p-value
## X 17.94729 0.2050272 35581 87.53616     0
##
## Standardized Within-Group Residuals:
##      Min      Q1      Med      Q3      Max
## -3.2417739 -0.6863952 -0.1010124  0.5454877  4.5341875
##
## Number of Observations: 35604
## Number of Groups:
##      g Burrow %in% g
##      1          23

```

## Explore model fit

### Test for temporal autocorrelation

The residual function for gam in R returns the residuals without adjustment for the correlation structure. So must specify type = "normalized"

```
acf(residuals(gamm1_puffin$lme, type = "normalized"))
```

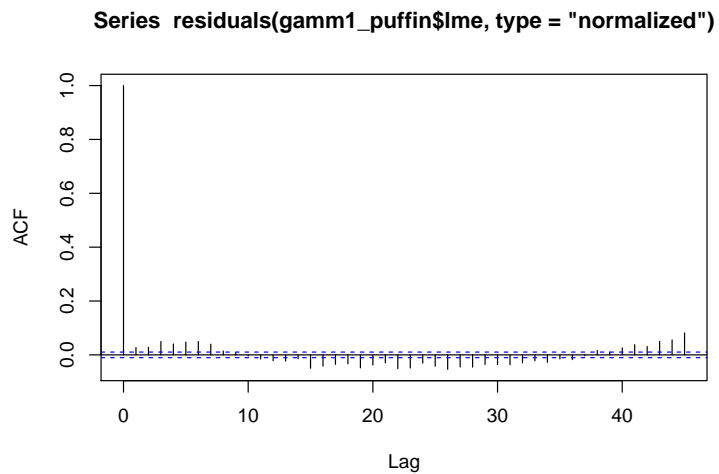

### Gam.check



```
gam.check(gamm1_puffin$gam)
```

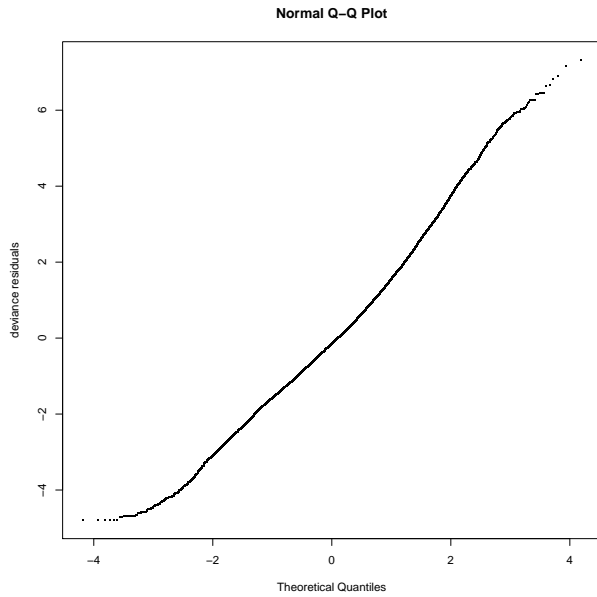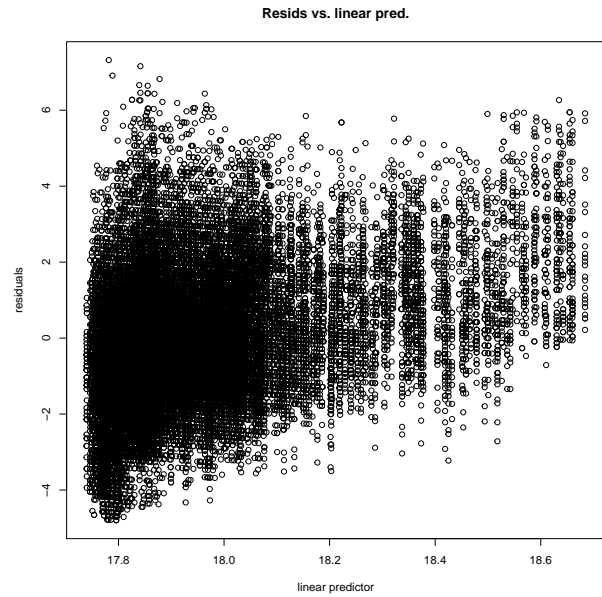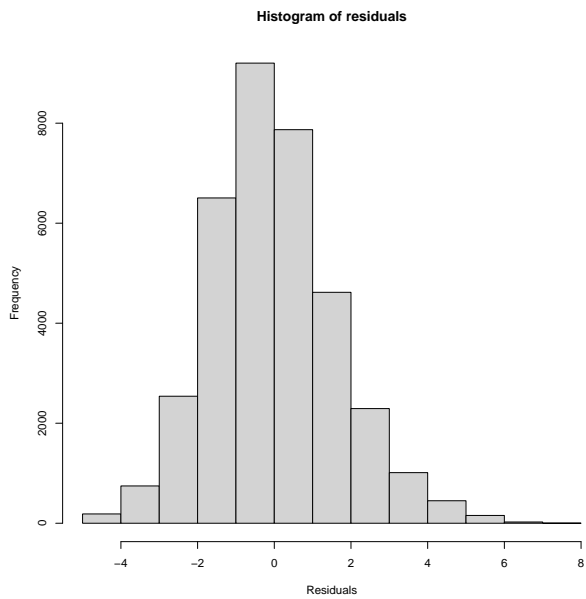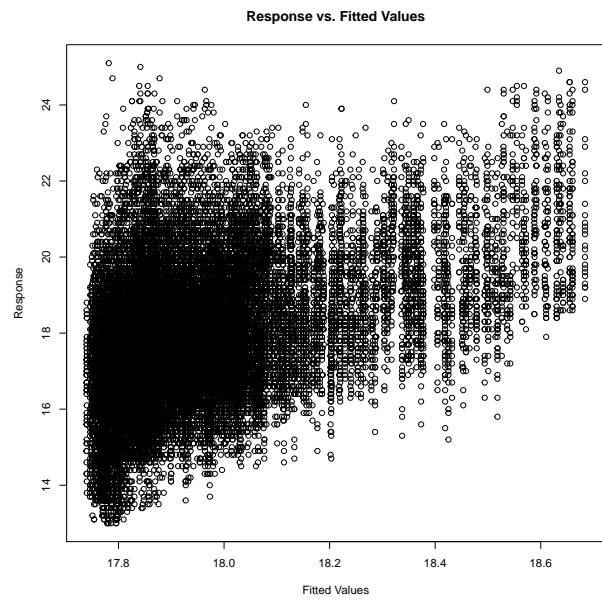

```
##
## 'gamm' based fit - care required with interpretation.
## Checks based on working residuals may be misleading.
## Basis dimension (k) checking results. Low p-value (k-index<1) may
## indicate that k is too low, especially if edf is close to k'.
##
##           k'  edf k-index p-value
## s(scale(Temperature),scale(Wind.Speed)) 29.0 25.3    0.7 <2e-16 ***
## ---
## Signif. codes:  0 '***' 0.001 '**' 0.01 '*' 0.05 '.' 0.1 ' ' 1
```

**lme plot**

```
plot(gamm1_puffin$lme)
```

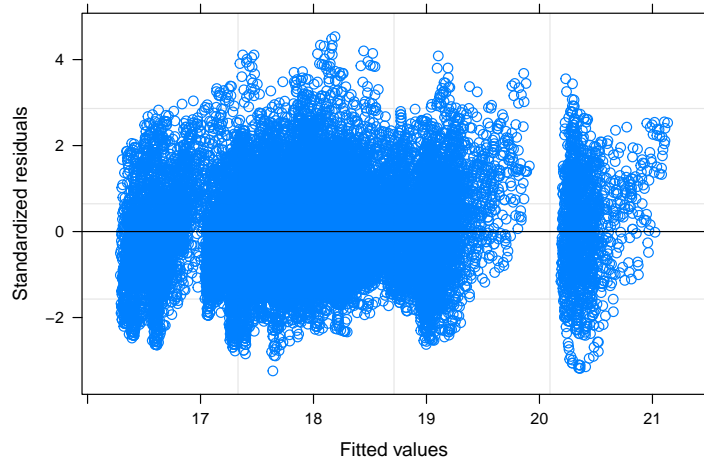

**Visualise the temp-wind interaction in 2D**

```
plot(gamm1_puffin$gam, scheme = 2, pages = 1)
```

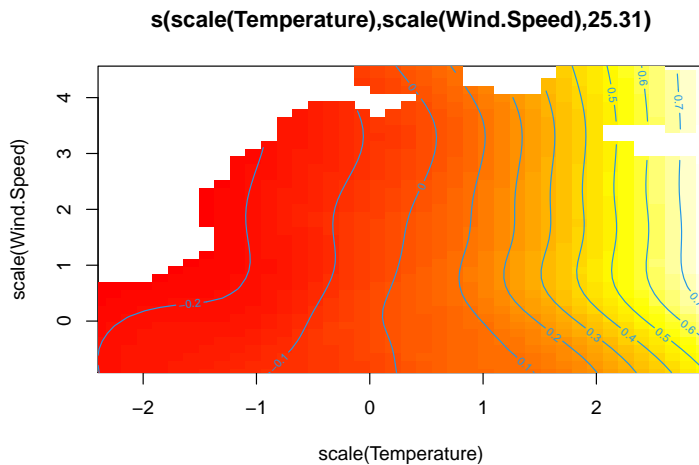

## **PETREL MODELS - Favourable burrow features during extreme temperatures**

Filter the data in the 99th percentile of external air temperatures recorded at the weather stations. This temperature were identified as 6.5°C.

```
## COLD
extreme_cold_LSSP <- filter(lssp, Temperature <= 6.5 & Species == "Leach's storm-petrel")
extreme_cold_LSSP$Extreme <- "Cold Extreme"
```

## Model S2.13 - GAM model - Cold extreme

```
# MODEL S2.13
gam_cold_lssp<- gam(data = extreme_cold_LSSP,
  buffer_kestrel~s(scale(Canopy), bs="ts") + # Weather
  s(scale(Entrance_Area),bs="ts") + # Weather
  s(scale(volume),bs="ts") + # Weather
  s(Burrow, bs="re"), # random effect
  method = "REML")
```

### Model Summary

```
##
## Family: gaussian
## Link function: identity
##
## Formula:
## buffer_kestrel ~ s(scale(Canopy), bs = "ts") + s(scale(Entrance_Area),
##   bs = "ts") + s(scale(volume), bs = "ts") + s(Burrow, bs = "re")
##
## Parametric coefficients:
##           Estimate Std. Error t value Pr(>|t|)
## (Intercept)  7.3974      0.2023   36.57 <2e-16 ***
## ---
## Signif. codes:  0 '***' 0.001 '**' 0.01 '*' 0.05 '.' 0.1 ' ' 1
##
## Approximate significance of smooth terms:
##           edf Ref.df    F p-value
## s(scale(Canopy))      3.612e-04     9  0.0  0.878
## s(scale(Entrance_Area)) 2.528e-04     9  0.0  0.846
## s(scale(volume))      2.602e-01     9 105.8  0.247
## s(Burrow)              2.848e+01    29 106.3 <2e-16 ***
## ---
## Signif. codes:  0 '***' 0.001 '**' 0.01 '*' 0.05 '.' 0.1 ' ' 1
##
## R-sq.(adj) = 0.832  Deviance explained = 83.9%
## -REML = 537.71  Scale est. = 0.24075  n = 660
```

### Explore model fit

#### Test for temporal autocorrelation

```
acf(residuals(gam_cold_lssp))
```

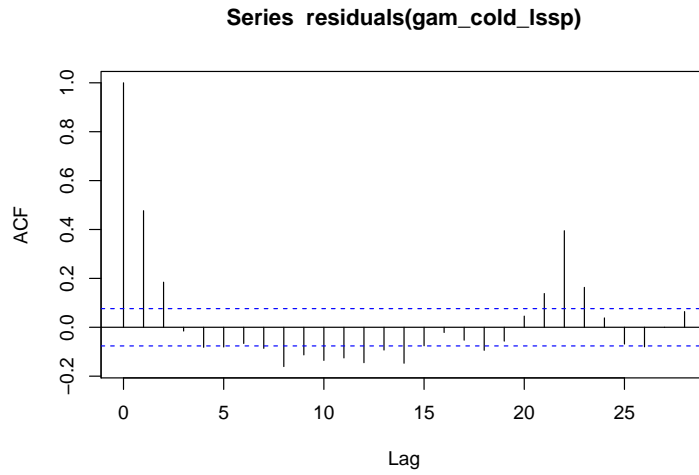

### Gam.check

```
gam.check(gam_cold_lssp)
```

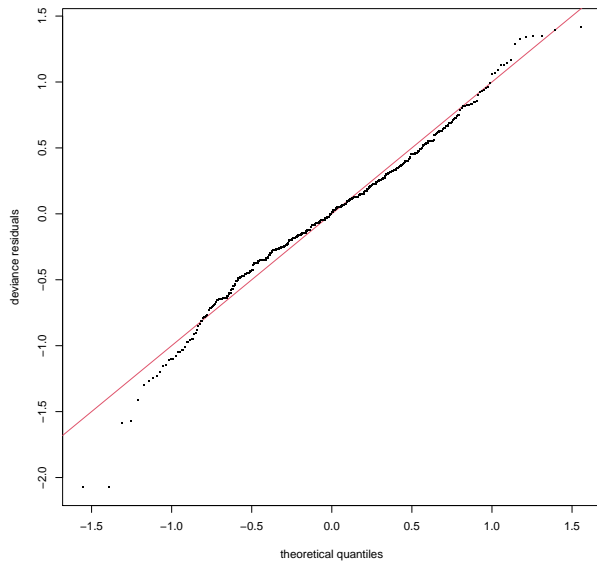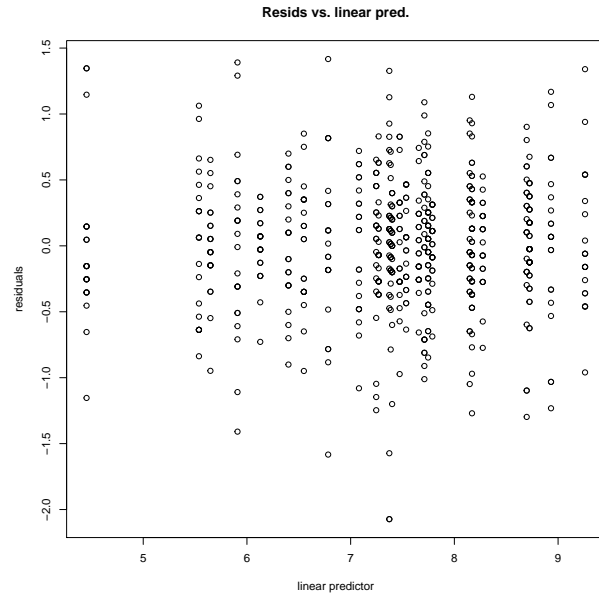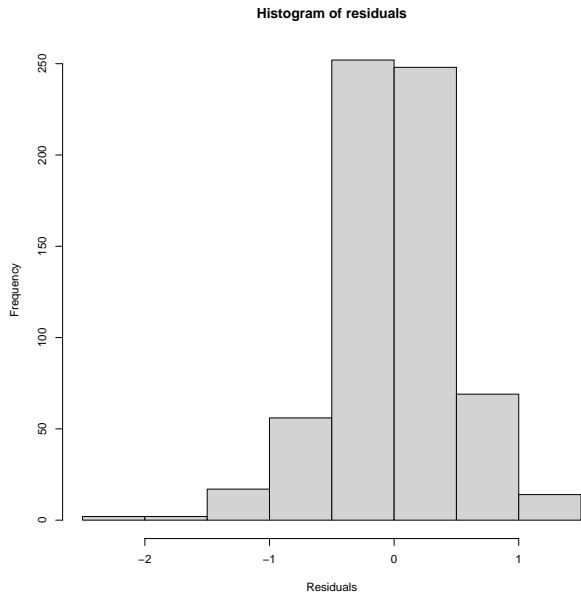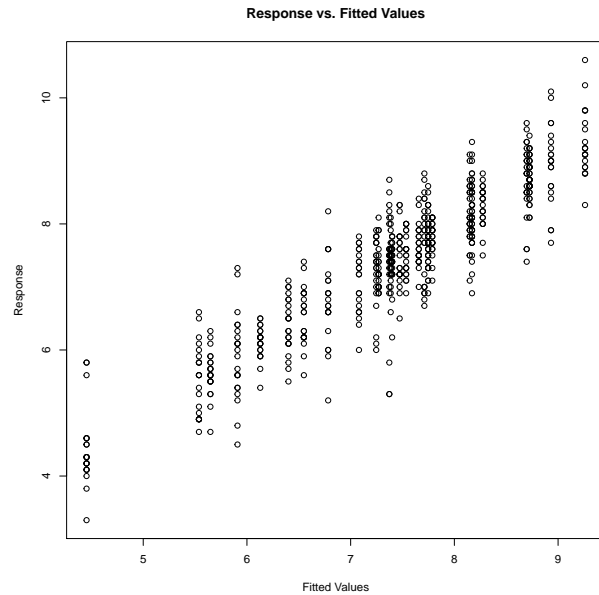

```
##
## Method: REML   Optimizer: outer newton
## full convergence after 10 iterations.
## Gradient range [-0.000176319,0.0002795324]
## (score 537.7096 & scale 0.2407496).
## Hessian positive definite, eigenvalue range [0.0001206716,330.1417].
## Model rank = 58 / 58
##
## Basis dimension (k) checking results. Low p-value (k-index<1) may
## indicate that k is too low, especially if edf is close to k'.
##
##           k'      edf k-index p-value
## s(scale(Canopy))      9.00e+00 3.61e-04  0.54 <2e-16 ***
## s(scale(Entrance_Area)) 9.00e+00 2.53e-04  0.52 <2e-16 ***
```

```
## s(scale(volume))          9.00e+00 2.60e-01 0.51 <2e-16 ***
## s(Burrow)                 3.00e+01 2.85e+01 NA NA
## ---
## Signif. codes:  0 '***' 0.001 '**' 0.01 '*' 0.05 '.' 0.1 ' ' 1
```

## Plotting

```
plot(gam_cold_lssp, pages = 1)
```

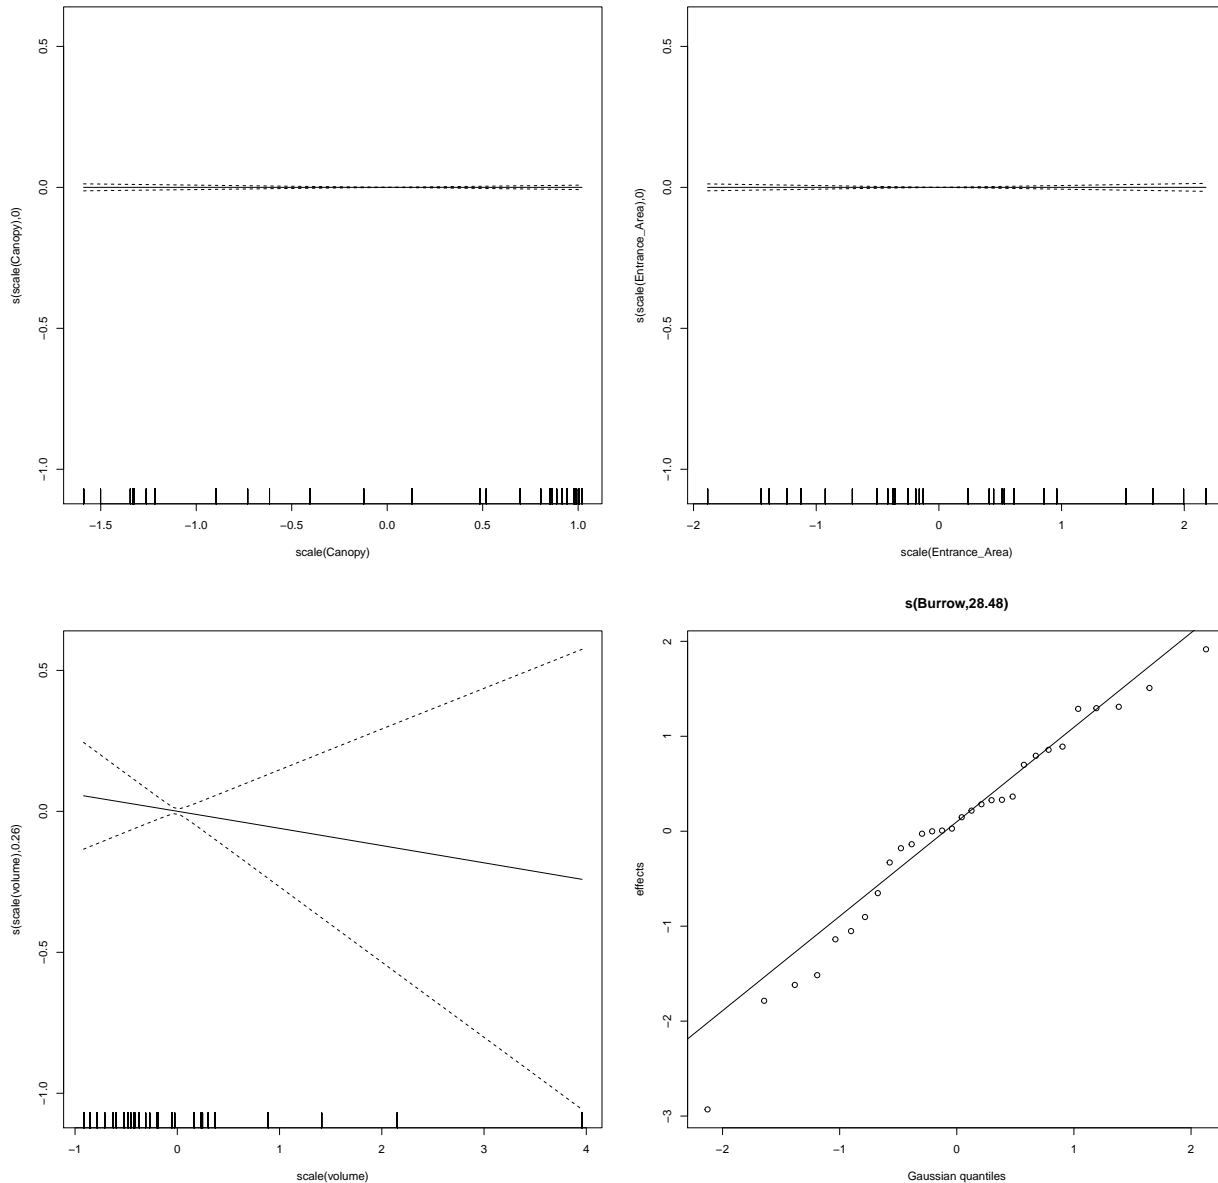

## Model S2.14 - GAMM with corAR1 - cold extreme

```

# MODEL S2.14
gamm_cold_lssp <- gamm(data = extreme_cold_LSSP,
  buffer_kestrel~ s(scale(Canopy), bs="ts") +
  s(scale(Entrance_Area),bs="ts") + #
  s(scale(volume),bs="ts"), # Weather
  random = list(Burrow = ~1),# Burrow features
  corr = corAR1(form = ~ 1|Burrow),
  method = "REML")

```

## Model Summary - gam

```

##
## Family: gaussian
## Link function: identity
##
## Formula:
## buffer_kestrel ~ s(scale(Canopy), bs = "ts") + s(scale(Entrance_Area),
##   bs = "ts") + s(scale(volume), bs = "ts")
##
## Parametric coefficients:
##           Estimate Std. Error t value Pr(>|t|)
## (Intercept)  7.3933      0.2014  36.71  <2e-16 ***
## ---
## Signif. codes:  0 '***' 0.001 '**' 0.01 '*' 0.05 '.' 0.1 ' ' 1
##
## Approximate significance of smooth terms:
##           edf Ref.df      F p-value
## s(scale(Canopy))      6.420e-06      9 0.000  0.911
## s(scale(Entrance_Area)) 7.602e-06      9 0.000  0.827
## s(scale(volume))      3.307e-01      9 0.054  0.223
##
## R-sq.(adj) =  0.0216
##   Scale est. = 0.28322   n = 660

```

## Model Summary - lme

```

## Linear mixed-effects model fit by REML
##   Data: strip.offset(mf)
##       AIC      BIC    logLik
## 854.2383 885.6733 -420.1191
##
## Random effects:
## Formula: ~Xr - 1 | g
## Structure: pdIdnot
##           Xr1           Xr2           Xr3           Xr4           Xr5
## StdDev: 0.0001069725 0.0001069725 0.0001069725 0.0001069725 0.0001069725
##           Xr6           Xr7           Xr8           Xr9
## StdDev: 0.0001069725 0.0001069725 0.0001069725 0.0001069725
##
## Formula: ~Xr.0 - 1 | g.0 %in% g
## Structure: pdIdnot
##           Xr.01           Xr.02           Xr.03           Xr.04           Xr.05

```

```

## StdDev: 0.0001283057 0.0001283057 0.0001283057 0.0001283057 0.0001283057
##           Xr.06           Xr.07           Xr.08           Xr.09
## StdDev: 0.0001283057 0.0001283057 0.0001283057 0.0001283057
##
## Formula: ~Xr.1 - 1 | g.1 %in% g.0 %in% g
## Structure: pdIdnot
##           Xr.11           Xr.12           Xr.13           Xr.14           Xr.15           Xr.16
## StdDev: 0.03351689 0.03351689 0.03351689 0.03351689 0.03351689 0.03351689
##           Xr.17           Xr.18           Xr.19
## StdDev: 0.03351689 0.03351689 0.03351689
##
## Formula: ~1 | Burrow %in% g.1 %in% g.0 %in% g
##           (Intercept) Residual
## StdDev:    1.081644 0.5321858
##
## Correlation Structure: AR(1)
## Formula: ~1 | g/g.0/g.1/Burrow
## Parameter estimate(s):
##           Phi
## 0.6143071
## Fixed effects: y ~ X - 1
##           Value Std.Error DF t-value p-value
## X 7.393323 0.2014135 630 36.70719 0
##
## Standardized Within-Group Residuals:
##           Min           Q1           Med           Q3           Max
## -3.685602874 -0.524979039 -0.008461842 0.562424838 2.703142724
##
## Number of Observations: 660
## Number of Groups:
##           g           g.0 %in% g
##           1           1
##           g.1 %in% g.0 %in% g Burrow %in% g.1 %in% g.0 %in% g
##           1           30

```

## Explore model fit

### Test for temporal autocorrelation

The residual function for gam in R returns the residuals without adjustment for the correlation structure. So must specify type = "normalized"

```
acf(residuals(gamm_cold_lssp$lme, type = "normalized"))
```



Series residuals(gamm\_cold\_lssp\$lme, type = "normalized")

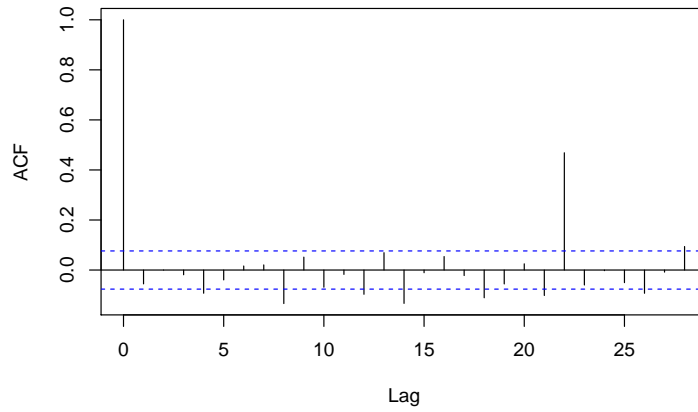

### Gam.check

```
gam.check(gamm_cold_lssp$gam)
```

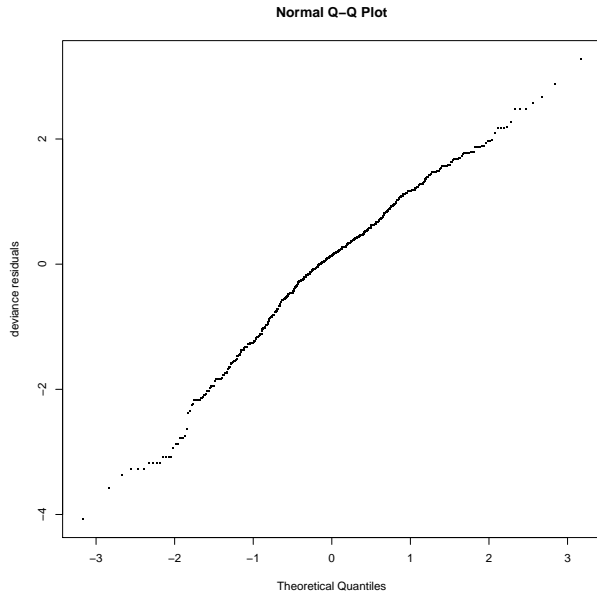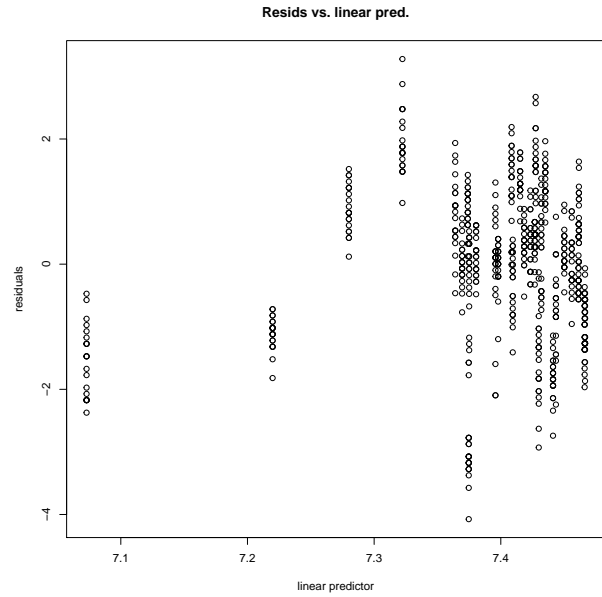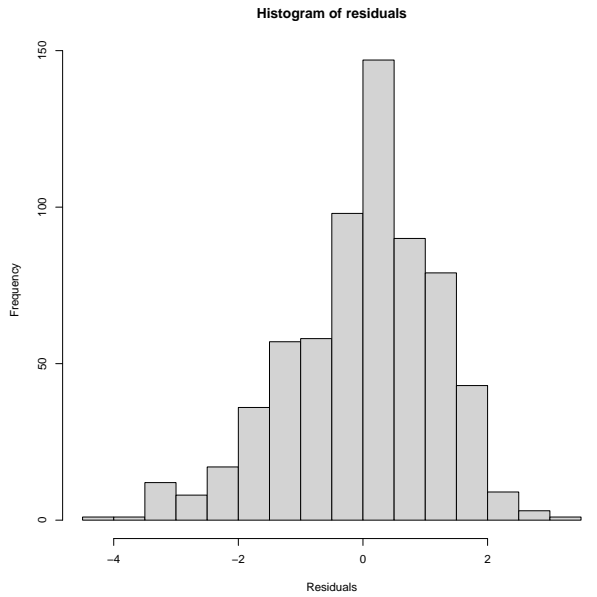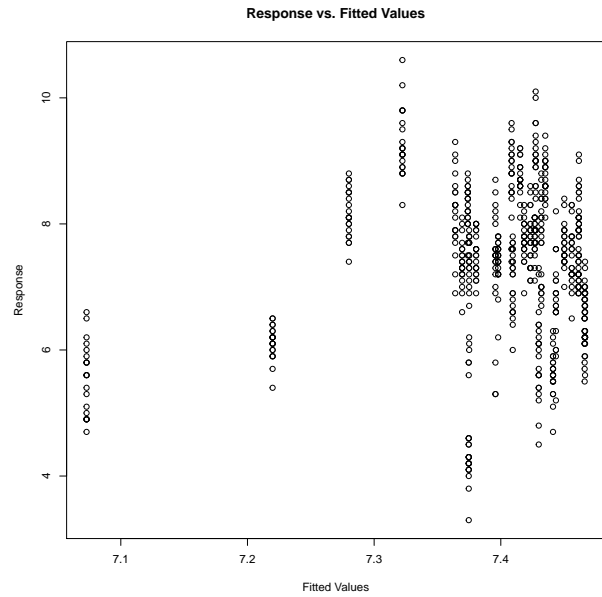

```
##
## 'gamm' based fit - care required with interpretation.
## Checks based on working residuals may be misleading.
## Basis dimension (k) checking results. Low p-value (k-index<1) may
## indicate that k is too low, especially if edf is close to k'.
##
##           k'      edf k-index p-value
## s(scale(Canopy))      9.00e+00 6.42e-06  0.13 <2e-16 ***
## s(scale(Entrance_Area)) 9.00e+00 7.60e-06  0.13 <2e-16 ***
## s(scale(volume))      9.00e+00 3.31e-01  0.12 <2e-16 ***
## ---
## Signif. codes:  0 '***' 0.001 '**' 0.01 '*' 0.05 '.' 0.1 ' ' 1
```

lme plot

```
plot(gamm_cold_lssp$lme)
```

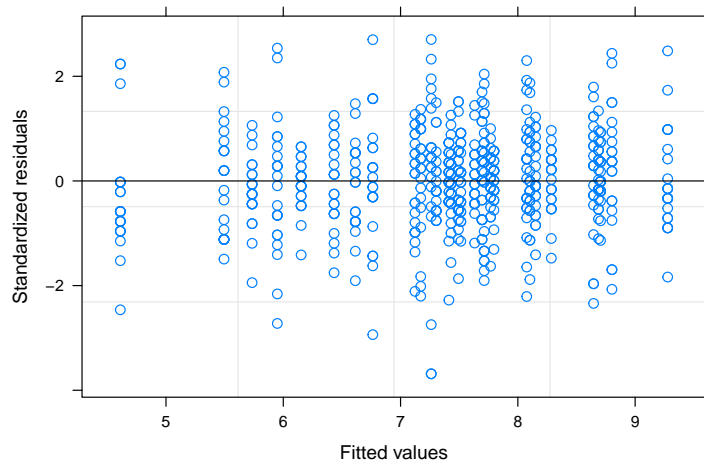

Plot

```
plot(gamm_cold_lssp$gam, pages = 1)
```

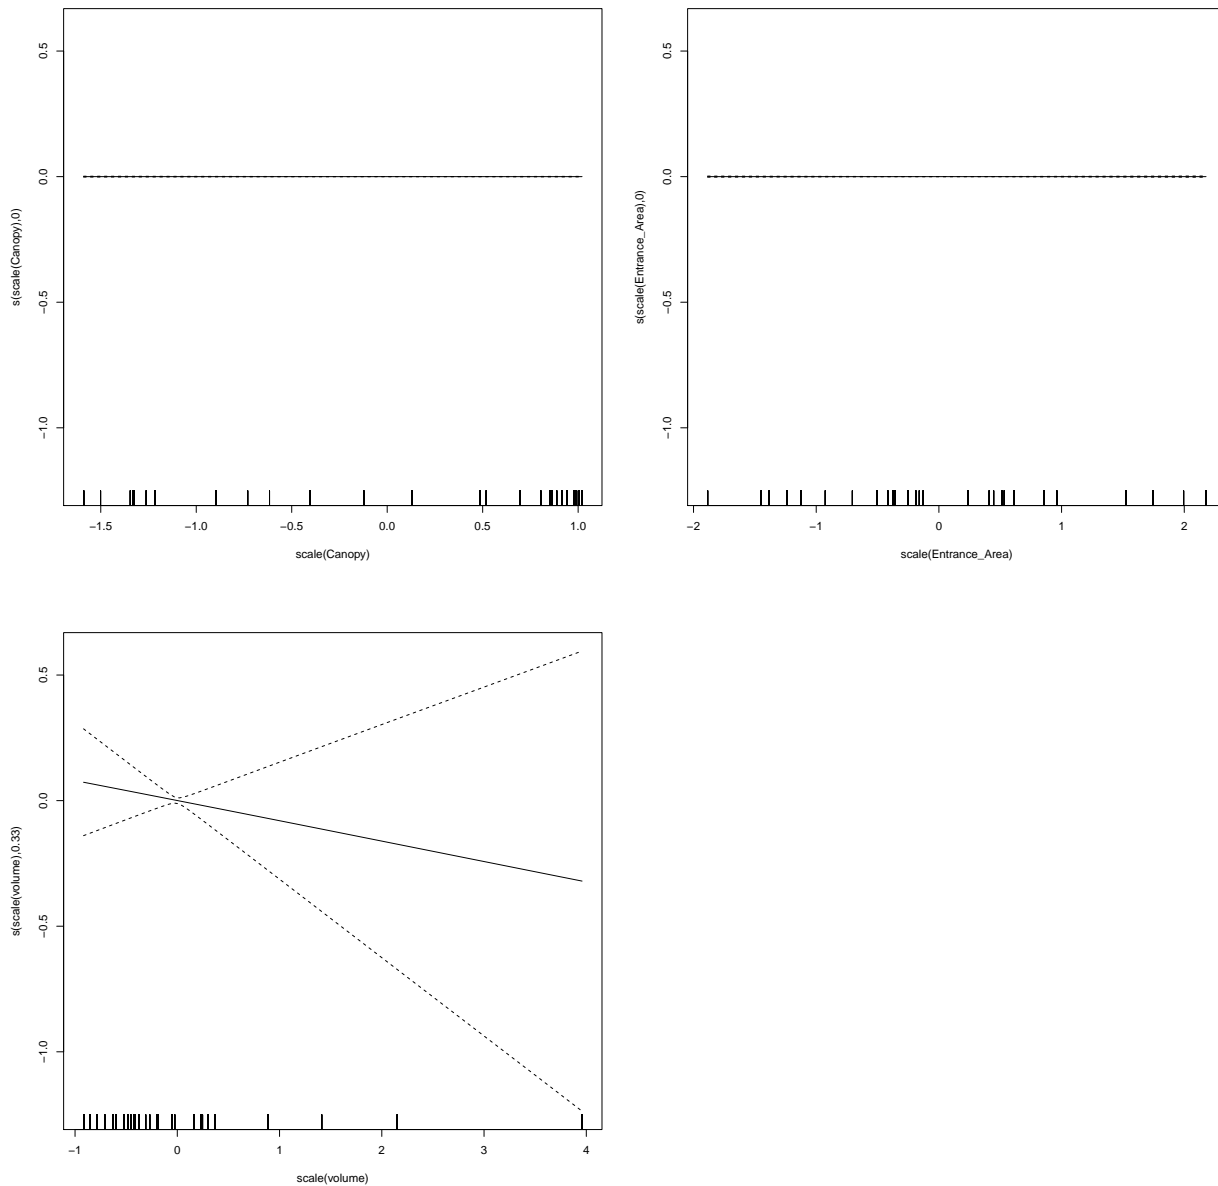

## PUFFIN MODELS - Favourable burrow features during extreme temperatures

Filter the data in the 99th percentile of external air temperatures recorded at the weather stations. The temperature was identified as 10°C.

```
## COLD
extreme_cold_ATPU <- filter(atpu.wind, Temperature <= 10 & Species == "Atlantic puffin")
extreme_cold_ATPU$Extreme <- "Cold Extreme"
```

## Model S2.15 - GAM model - Cold extreme

```
## MODEL S2.15
gam_cold_ATPU<- gam(data = extreme_cold_ATPU,
  buffer_kestrel~s(scale(Entrance_Area),bs="ts") + # Weather
  s(scale(volume),bs="ts") + # Weather
  s(Burrow, bs="re"), # random effect
  method = "REML")
```

### Model Summary

```
##
## Family: gaussian
## Link function: identity
##
## Formula:
## buffer_kestrel ~ s(scale(Entrance_Area), bs = "ts") + s(scale(volume),
##   bs = "ts") + s(Burrow, bs = "re")
##
## Parametric coefficients:
##           Estimate Std. Error t value Pr(>|t|)
## (Intercept)  8.1187      0.2401   33.81 <2e-16 ***
## ---
## Signif. codes:  0 '***' 0.001 '**' 0.01 '*' 0.05 '.' 0.1 ' ' 1
##
## Approximate significance of smooth terms:
##           edf Ref.df      F p-value
## s(scale(Entrance_Area)) 7.472e-04     9  0.0 0.5208
## s(scale(volume))       8.281e-01     9 242.5 0.0214 *
## s(Burrow)              1.937e+01    21  22.8 <2e-16 ***
## ---
## Signif. codes:  0 '***' 0.001 '**' 0.01 '*' 0.05 '.' 0.1 ' ' 1
##
## R-sq.(adj) = 0.609  Deviance explained = 62.9%
## -REML = 579.43  Scale est. = 0.90959  n = 396
```

### Explore model fit

#### Test for temporal autocorrelation

```
acf(residuals(gam_cold_ATPU))
```

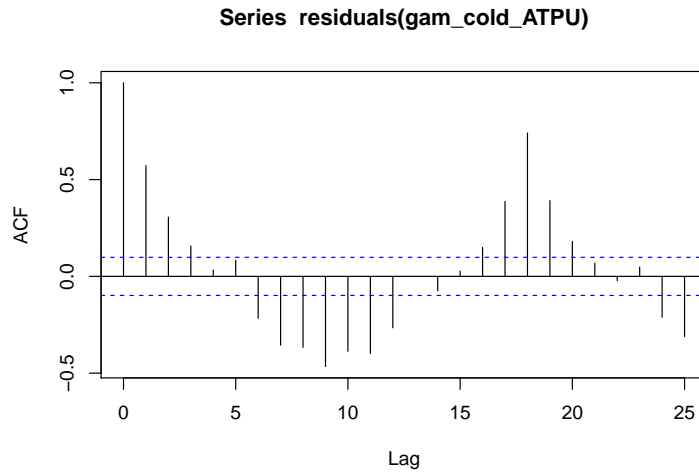

### Gam.check

```
gam.check(gam_cold_ATPU)
```

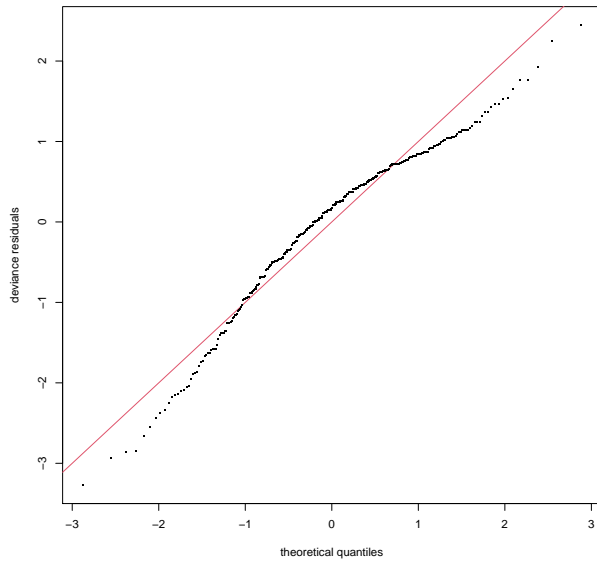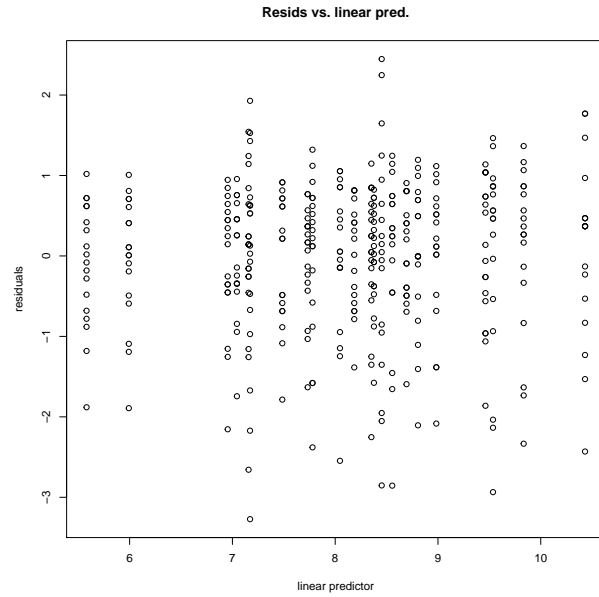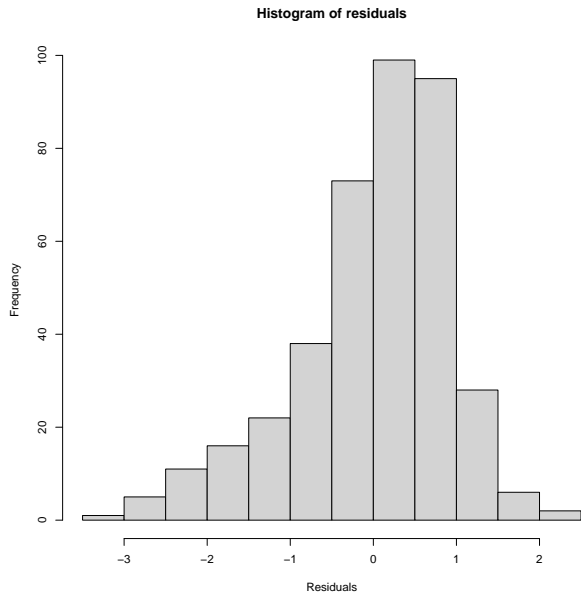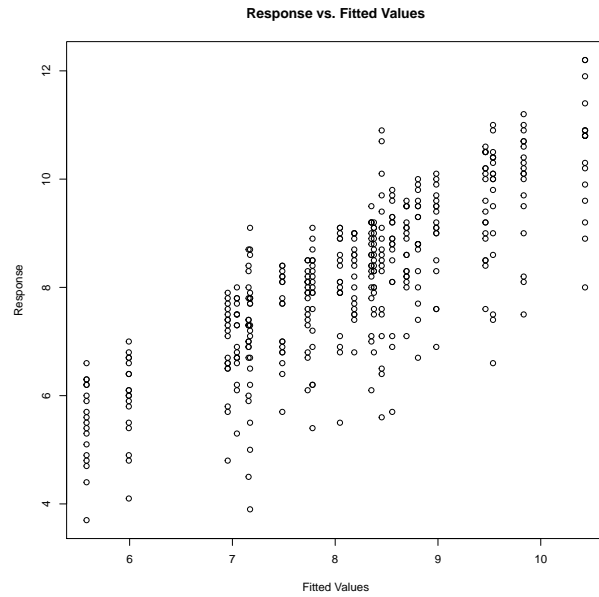

```
##
## Method: REML   Optimizer: outer newton
## full convergence after 9 iterations.
## Gradient range [-0.0002196821,0.000153432]
## (score 579.4342 & scale 0.9095871).
## Hessian positive definite, eigenvalue range [0.0002196303,197.9975].
## Model rank = 41 / 41
##
## Basis dimension (k) checking results. Low p-value (k-index<1) may
## indicate that k is too low, especially if edf is close to k'.
##
##           k'      edf k-index p-value
## s(scale(Entrance_Area)) 9.00e+00 7.47e-04 0.41 <2e-16 ***
## s(scale(volume))       9.00e+00 8.28e-01 0.43 <2e-16 ***
```

```
## s(Burrow)          2.20e+01 1.94e+01      NA      NA
## ---
## Signif. codes:  0 '***' 0.001 '**' 0.01 '*' 0.05 '.' 0.1 ' ' 1
```

## Plotting

```
plot(gam_cold_ATPU, pages = 1)
```

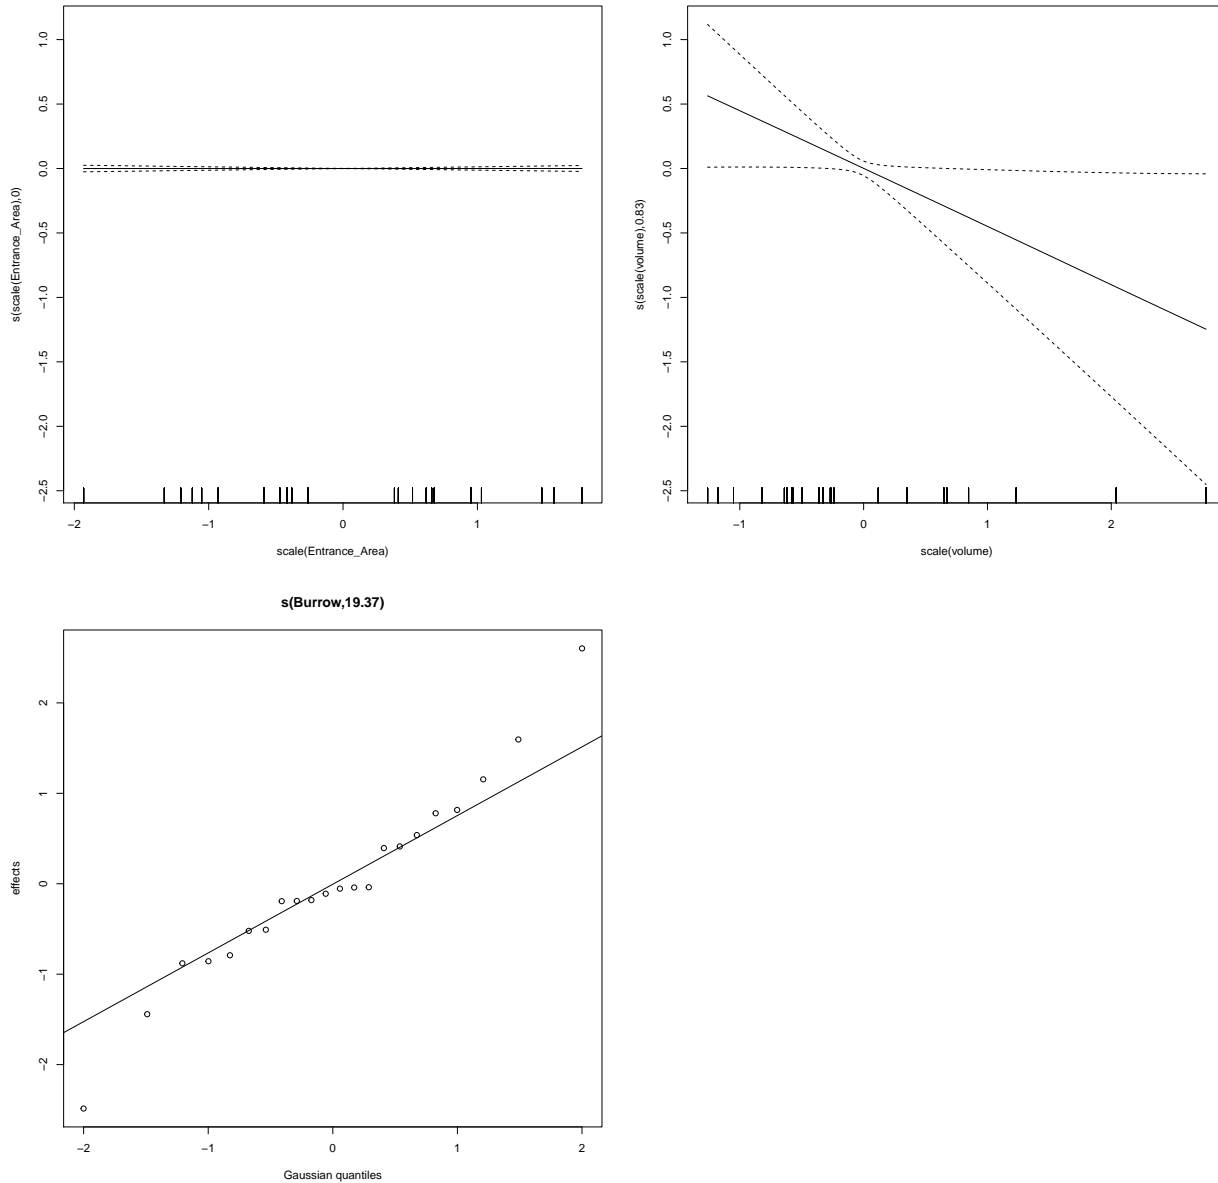

Model S2.16 - GAMM with corAR1 - cold extreme



```

# Model S2.16
gamm_cold_ATPU <- gamm(data = extreme_cold_ATPU,
  buffer_kestrel~ s(scale(Entrance_Area),bs="ts") + #
  s(scale(volume),bs="ts"), # Weather
  random = list(Burrow = ~1),# Burrow features # random effect
  corr = corAR1(form = ~ 1|Burrow),
  method = "REML")

```

## Model Summary - gam

```

##
## Family: gaussian
## Link function: identity
##
## Formula:
## buffer_kestrel ~ s(scale(Entrance_Area), bs = "ts") + s(scale(volume),
##   bs = "ts")
##
## Parametric coefficients:
##           Estimate Std. Error t value Pr(>|t|)
## (Intercept)  7.5087      0.3023   24.84 <2e-16 ***
## ---
## Signif. codes:  0 '***' 0.001 '**' 0.01 '*' 0.05 '.' 0.1 ' ' 1
##
## Approximate significance of smooth terms:
##           edf Ref.df    F p-value
## s(scale(Entrance_Area)) 7.567e-08     9 0.000  0.6064
## s(scale(volume))       7.358e-01     9 0.296  0.0564 .
## ---
## Signif. codes:  0 '***' 0.001 '**' 0.01 '*' 0.05 '.' 0.1 ' ' 1
##
## R-sq.(adj) =  0.123
##   Scale est. = 3.0192    n = 396

```

## Model Summary - lme

```

## Linear mixed-effects model fit by REML
##   Data: strip.offset(mf)
##       AIC      BIC    logLik
## 753.0963 776.9696 -370.5482
##
## Random effects:
## Formula: ~Xr - 1 | g
## Structure: pdIdnot
##           Xr1           Xr2           Xr3           Xr4           Xr5
## StdDev: 1.484336e-05 1.484336e-05 1.484336e-05 1.484336e-05 1.484336e-05
##           Xr6           Xr7           Xr8           Xr9
## StdDev: 1.484336e-05 1.484336e-05 1.484336e-05 1.484336e-05
##
## Formula: ~Xr.0 - 1 | g.0 %in% g
## Structure: pdIdnot
##           Xr.01      Xr.02      Xr.03      Xr.04      Xr.05      Xr.06

```

```

## StdDev: 0.04924848 0.04924848 0.04924848 0.04924848 0.04924848 0.04924848
##           Xr.07      Xr.08      Xr.09
## StdDev: 0.04924848 0.04924848 0.04924848
##
## Formula: ~1 | Burrow %in% g.0 %in% g
##           (Intercept) Residual
## StdDev: 0.0002123481 1.73758
##
## Correlation Structure: AR(1)
## Formula: ~1 | g/g.0/Burrow
## Parameter estimate(s):
##           Phi
## 0.9427098
## Fixed effects: y ~ X - 1
##           Value Std.Error DF t-value p-value
## X 7.508655 0.3023402 374 24.83512 0
##
## Standardized Within-Group Residuals:
##           Min      Q1      Med      Q3      Max
## -2.1636641 -0.1517782 0.3399173 0.8381906 2.8564013
##
## Number of Observations: 396
## Number of Groups:
##           g           g.0 %in% g Burrow %in% g.0 %in% g
##           1           1           22

```

## Explore model fit

### Test for temporal autocorrelation

The residual function for gam in R returns the residuals without adjustment for the correlation structure. So must specify type = "normalized"

```
acf(residuals(gamm_cold_ATPU$lme, type = "normalized"))
```

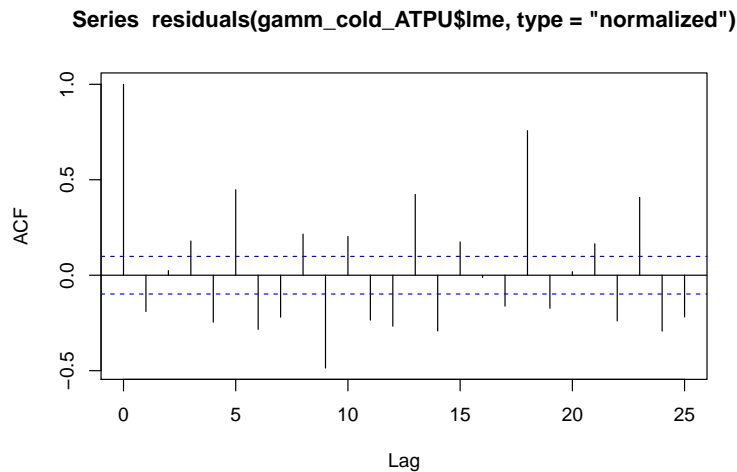

### Gam.check

```
gam.check(gamm_cold_ATPU$gam)
```

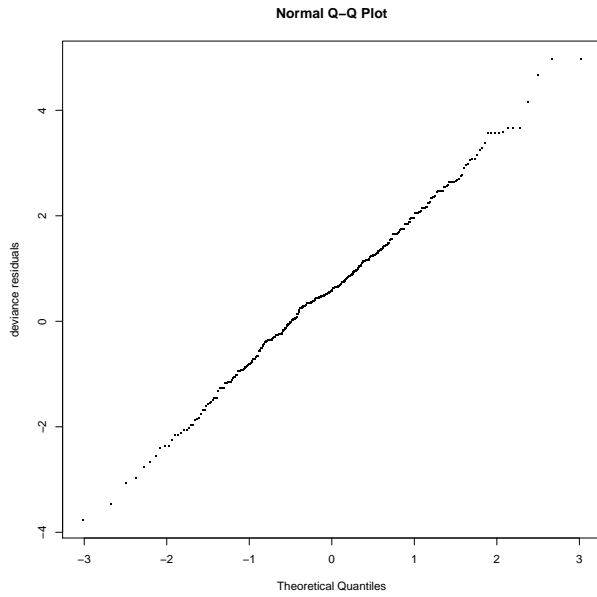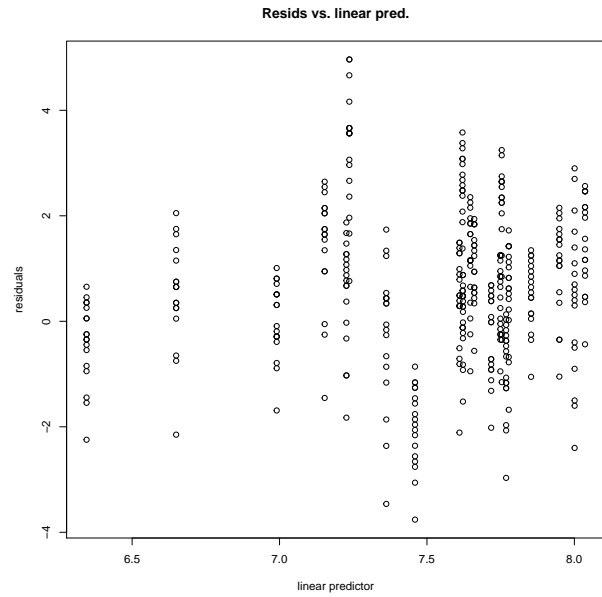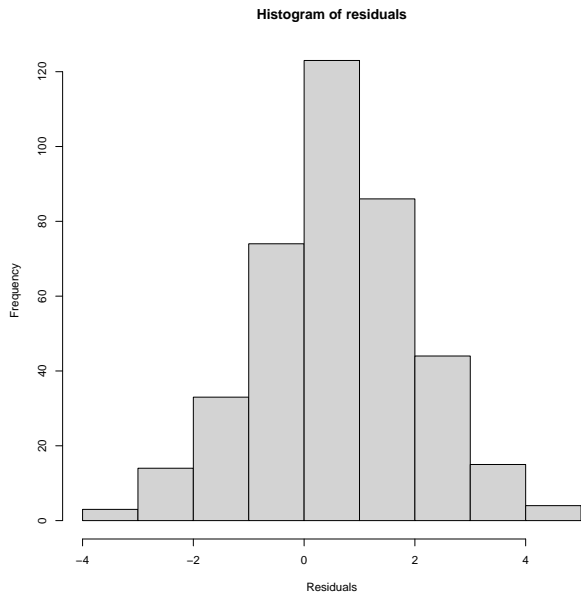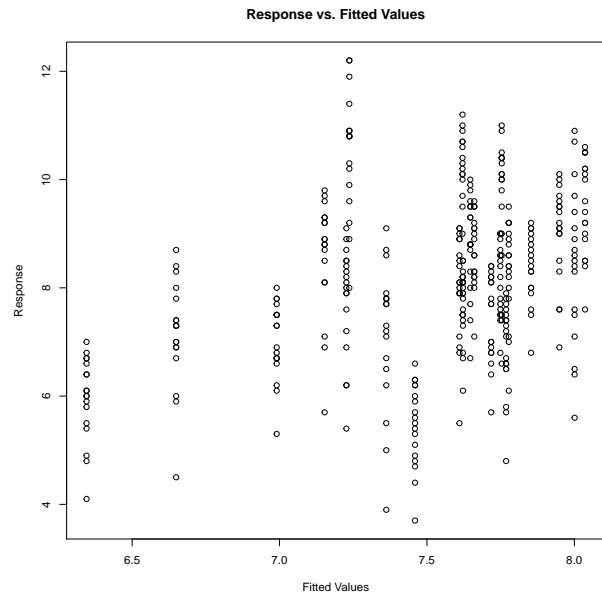

```
##
## 'gamm' based fit - care required with interpretation.
## Checks based on working residuals may be misleading.
## Basis dimension (k) checking results. Low p-value (k-index<1) may
## indicate that k is too low, especially if edf is close to k'.
##
##           k'      edf k-index p-value
## s(scale(Entrance_Area)) 9.00e+00 7.57e-08  0.17 <2e-16 ***
## s(scale(volume))       9.00e+00 7.36e-01  0.19 <2e-16 ***
## ---
## Signif. codes:  0 '***' 0.001 '**' 0.01 '*' 0.05 '.' 0.1 ' ' 1
```

## lme plot

```
plot(gamm_cold_ATPU$lme)
```

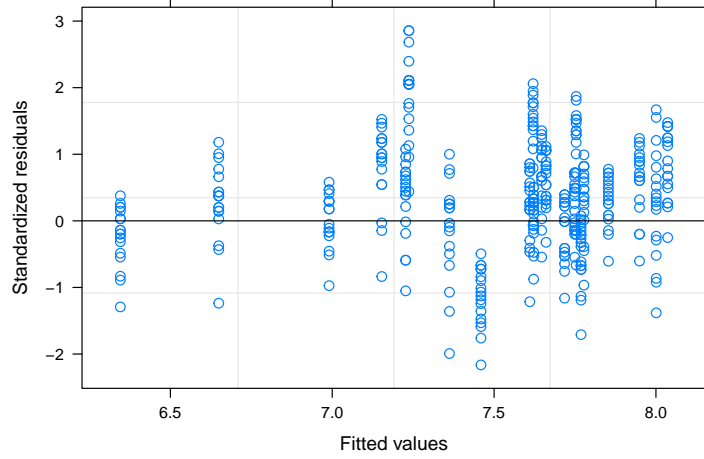

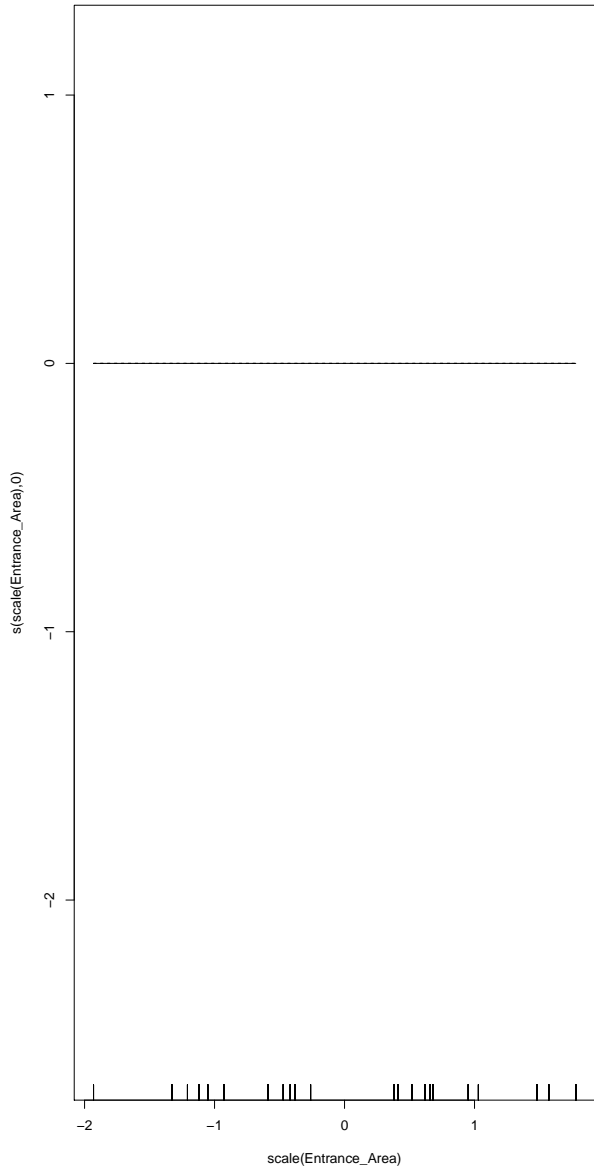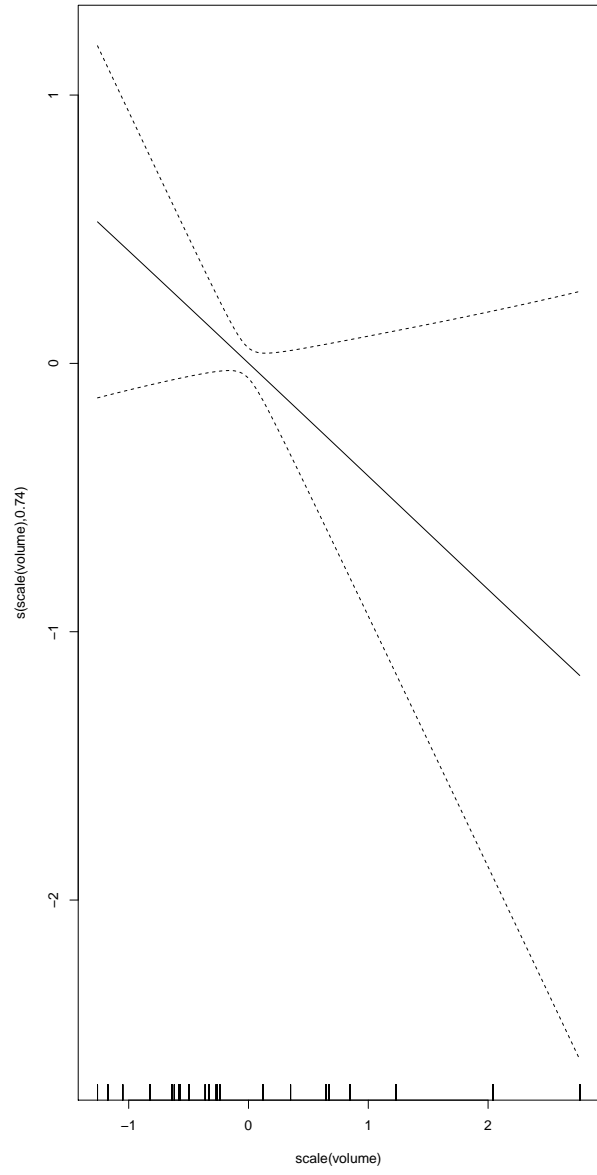

Supplement: facets-2023-0131supplb.pdf [file facets-2023-0131supplb.pdf]
